# Supplementary material for: Phosphate modulated nitrogen-doped titanium dioxide/carbon nitride heterogeneous photocatalysts with efficient O2 activation for ametryn degradation
Source: Royal Society of Chemistry journal article supplement (doi:10.1039/d4cy01167h), 2024-12-26
Supplement: d4cy01167h1.pdf [file d4cy01167h1.pdf]

## Phosphate Modulated Nitrogen-doped Titanium Dioxide/ Carbon Nitride Heterogeneous Photocatalysts with Efficient O<sub>2</sub> Activation for Ametryn Degradation

Xingyang Feng<sup>a,†</sup>, Changmei Zhao<sup>a,†</sup>, Junjie Zhou<sup>a,†</sup>, Fangzhu Shi<sup>a</sup>, Rui Yan<sup>a\*</sup>, Zhiqiang Wang<sup>a\*</sup>

a. Key Laboratory for Photonic and Electronic Bandgap Materials, Ministry of Education, College of Chemistry & Chemical Engineering, Harbin Normal University, Harbin 150025, China

\*Correspondence: yanrui-1981@163.com(R.Y.), wzq70402@163.com(Z.W.);

† These authors contributed equally to this work.

### 1 SEM of 4p-5NT/CN

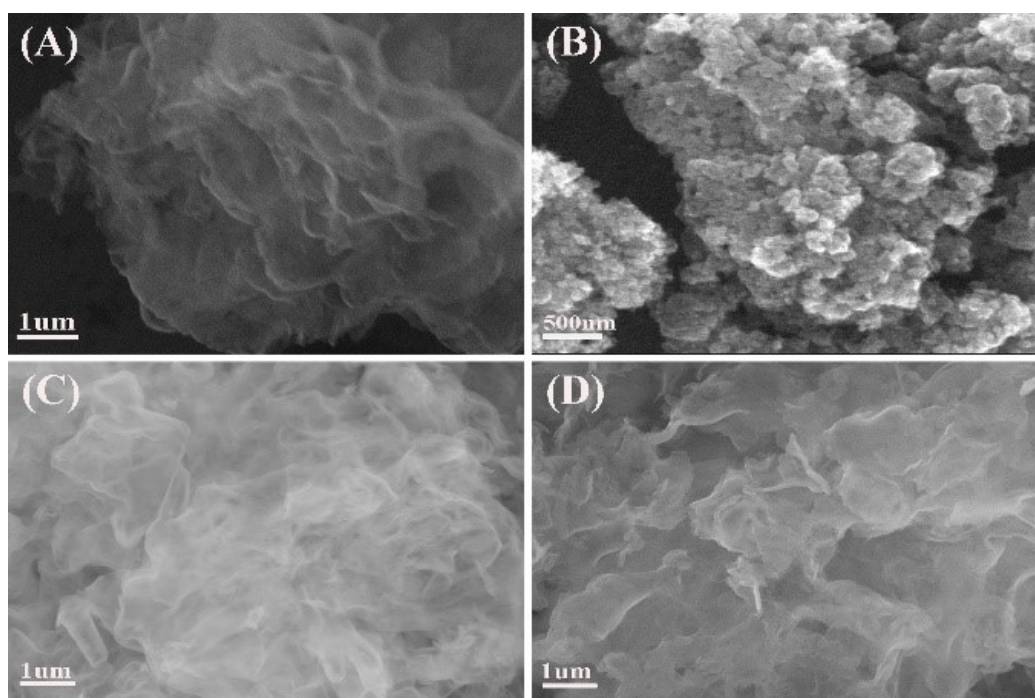

Fig. S1 SEM image of (A)CN 、 (B)NT 、 (C)5NT/CN 、 (D)4P-5NT/CN

### 2 XRD of 4p-5NT/CN, XPS full spectrum and C1s

The diffraction peaks at  $2\theta = 27.3^\circ$  (002) and  $13.1^\circ$  (100) proved that the synthesised sample was CN. NT diffraction peaks were observed at  $25.4^\circ$ ,  $37.8^\circ$ ,  $48.1^\circ$ ,  $54.0^\circ$ ,  $55.1^\circ$ ,  $62.8^\circ$ ,  $68.8^\circ$ ,  $72.3^\circ$  and  $75.1^\circ$ , corresponding to (101), (004), (200), (105), (211), (204), (116), (220) and (215) crystal planes, and two other small peaks at  $36.9^\circ$  and  $38.6^\circ$  corresponding to (103) and (112) crystal planes of anatase TiO<sub>2</sub>, respectively (JCPDF: 21-1272).

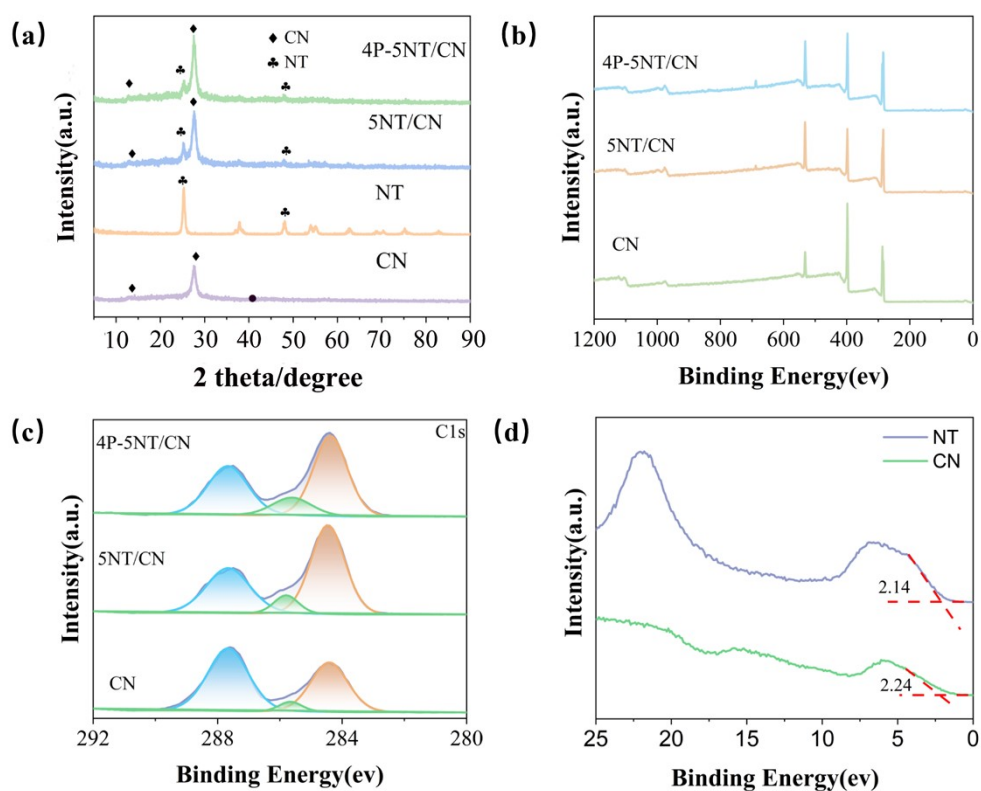

Fig. S2 (a) XRD patterns of CN、NT、5NT/CN 和 4P-5NT/CN (b-c) XPS for full spectra、C1s (d) XPS-VB plot.

### 3 XPS of O1s

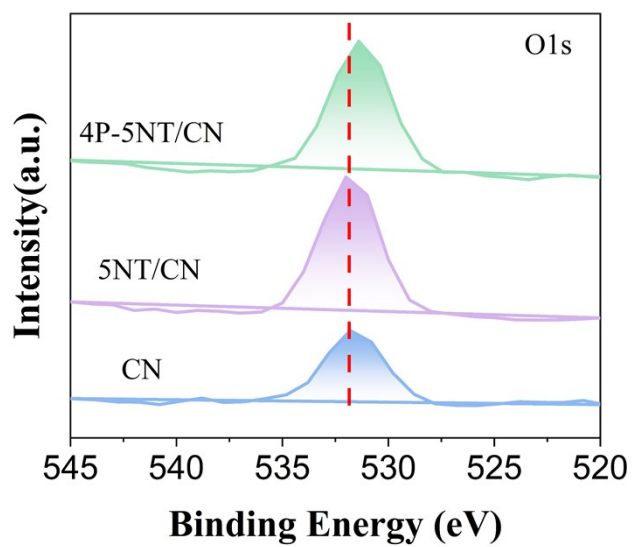

Fig. S3 O1s spectrum of XPS

## 4 Electrochemical performance characterization

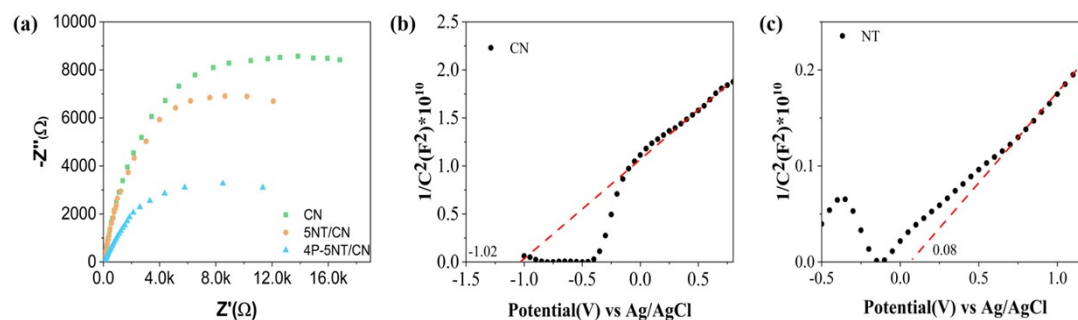

Fig. S4 (a-c) EIS; M-S of CN、NT image

|                           | CN      | NT      |
|---------------------------|---------|---------|
| MS- $E_{fb}$ (Vs Ag/AgCl) | -1.02eV | 0.08eV  |
| MS- $E_{fb}$ (Vs NHE)     | -0.82eV | 0.28eV  |
| $E_f \approx E_{fb}$      |         |         |
| $E_{VB}-E_f$              | 2.24eV  | 2.14eV  |
| $E_{VB}$                  | 1.42eV  | 2.42eV  |
| $E_g$                     | 2.73eV  | 3.03eV  |
| $E_{CB}=E_{VB}-E_g$       | -1.31eV | -0.61eV |

Table. S1 Calculation of the position of the VB and CB

## 5 XRD stability test

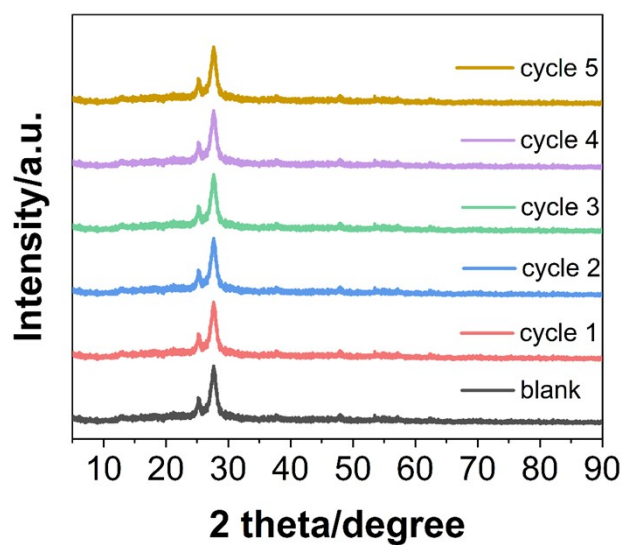

Fig. S5 XRD plots at different cycles

## 6 Stability Test and MTT

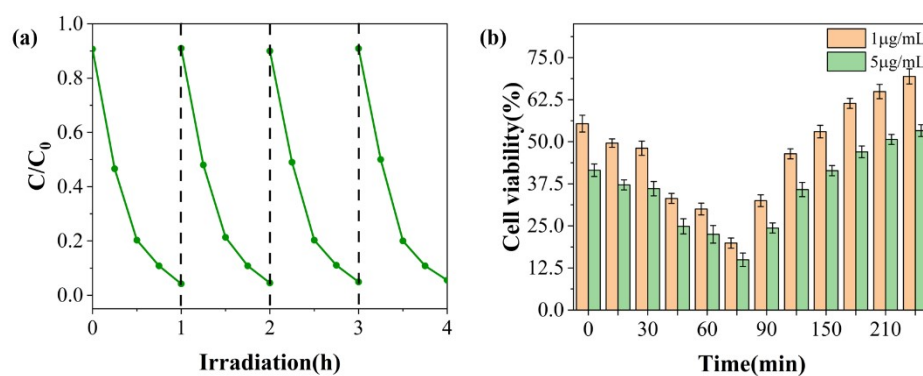

Fig.S6 (a) 4P-5NT/CN degradation Ametryn stability test chart ; (b) Histogram of growth inhibition of L929 cells by degradation of atrazine at different times

## 7 The energy band positions of CN and NT

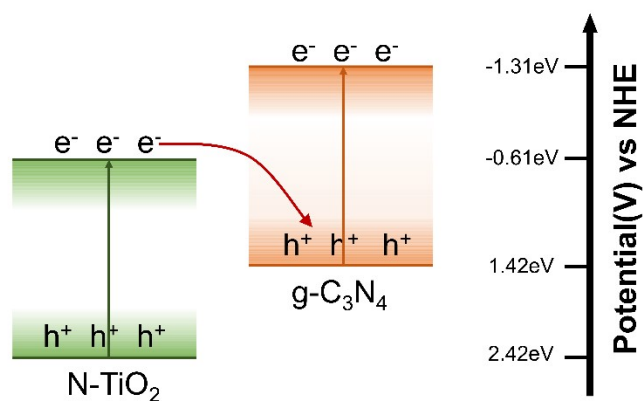

Fig. S7 The energy band positions of CN and NT

## 8 Normalized photocurrent action spectra

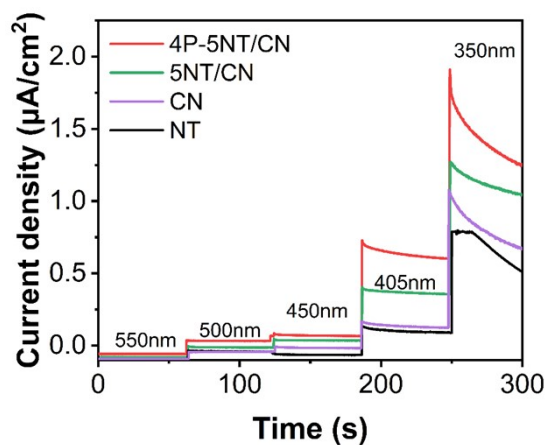

Fig. S8 Normalized photocurrent action spectra

## 9 Mass spectrum fragmentation and retention time

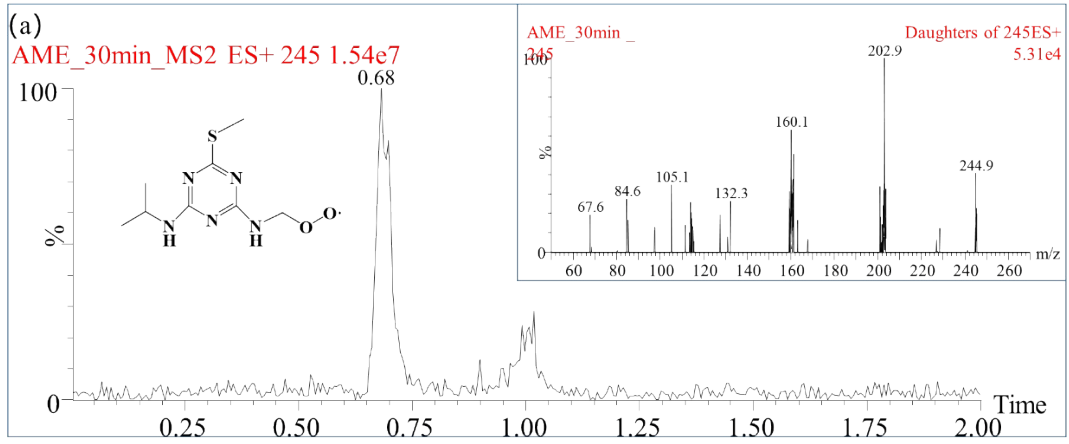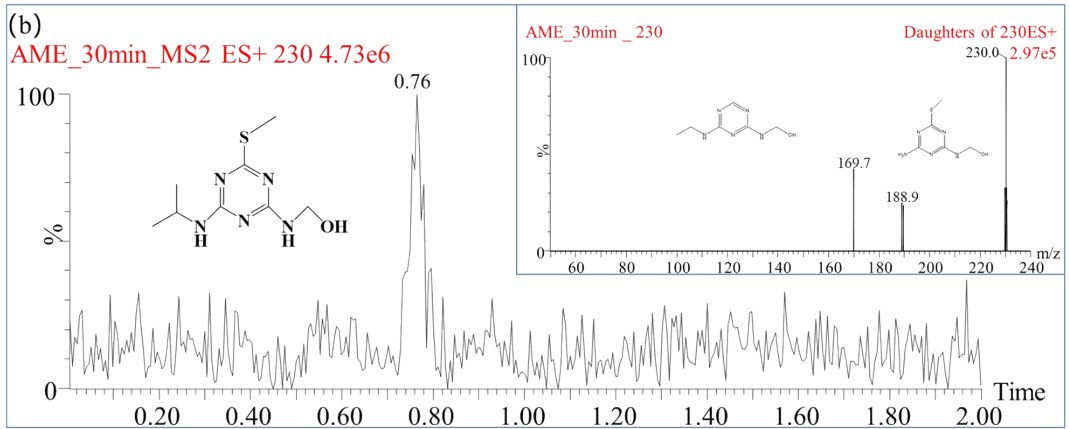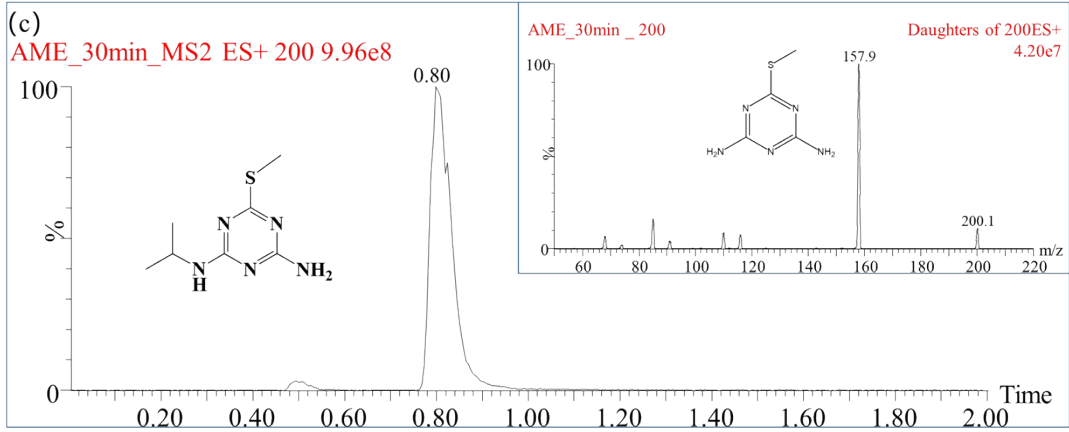

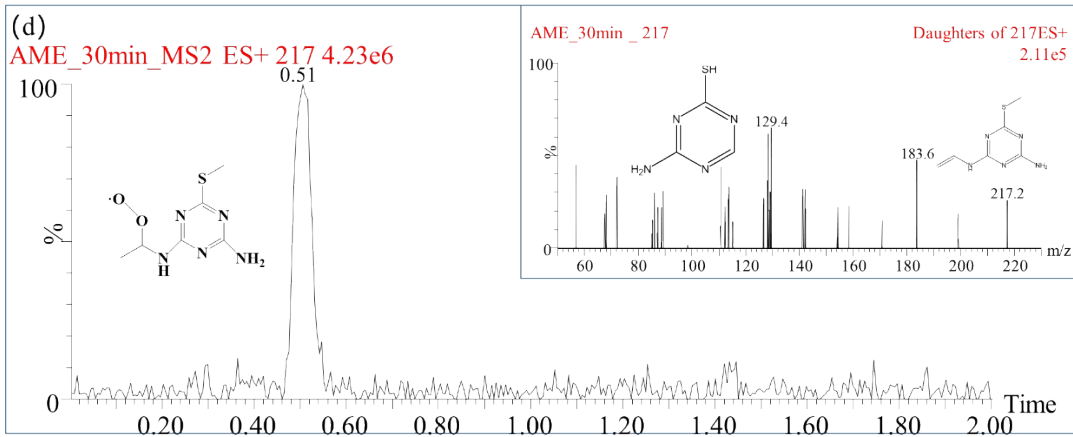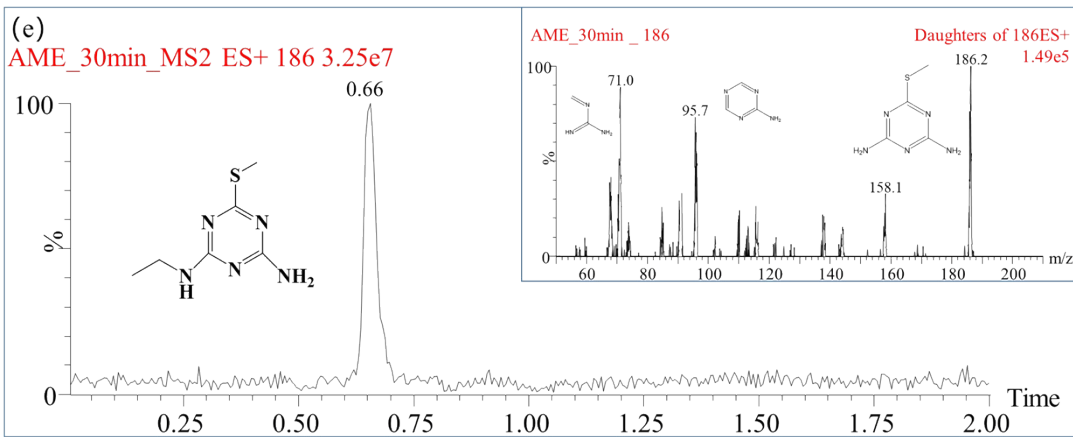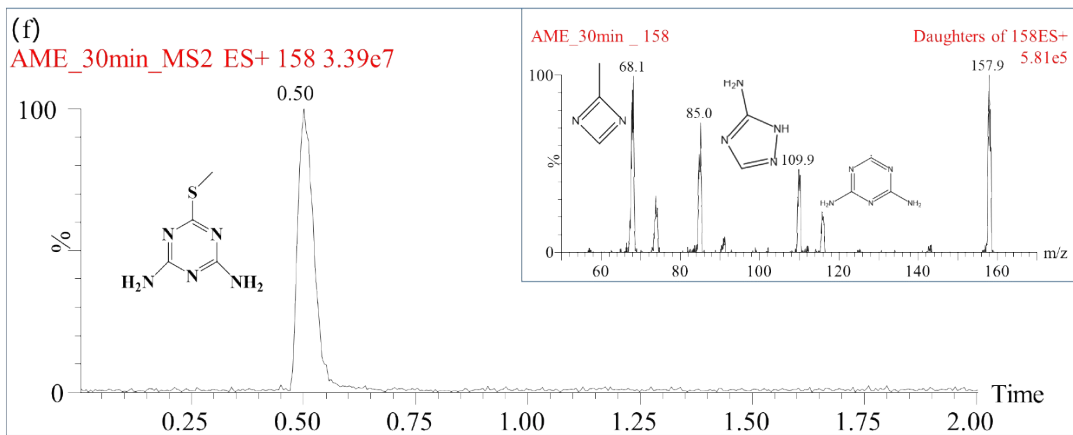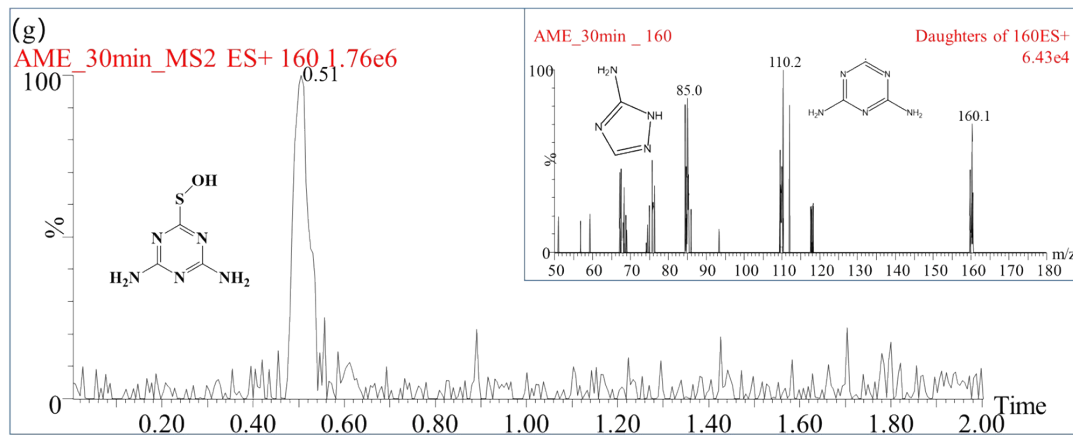

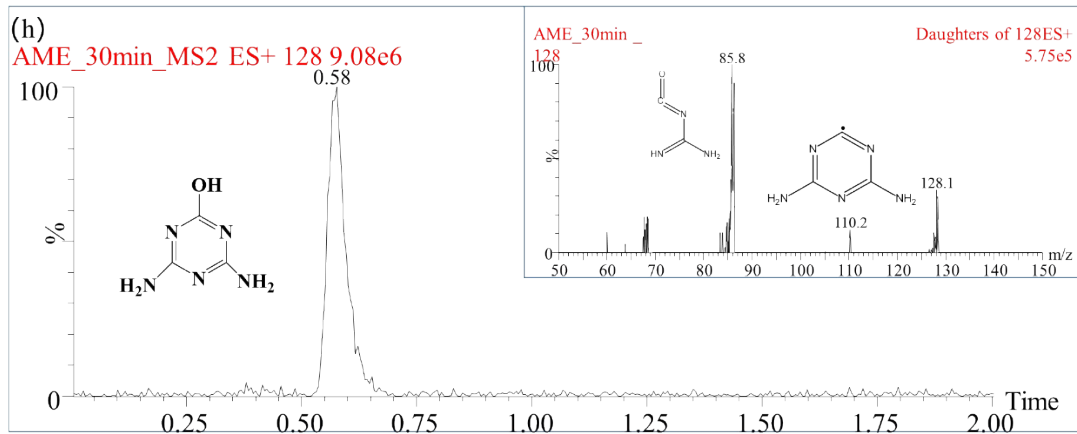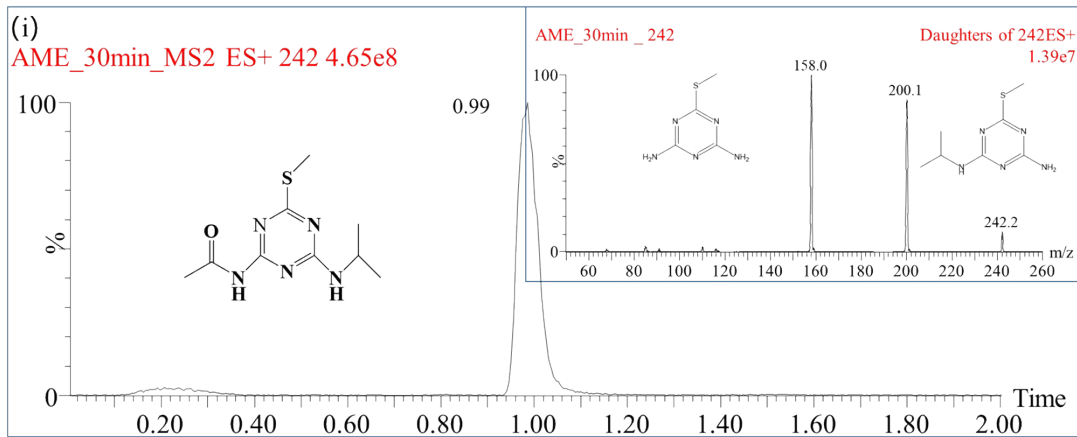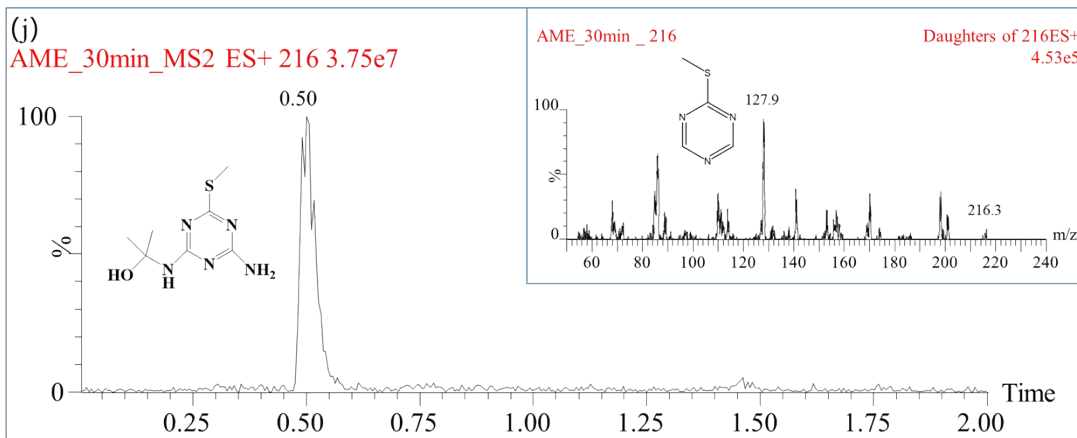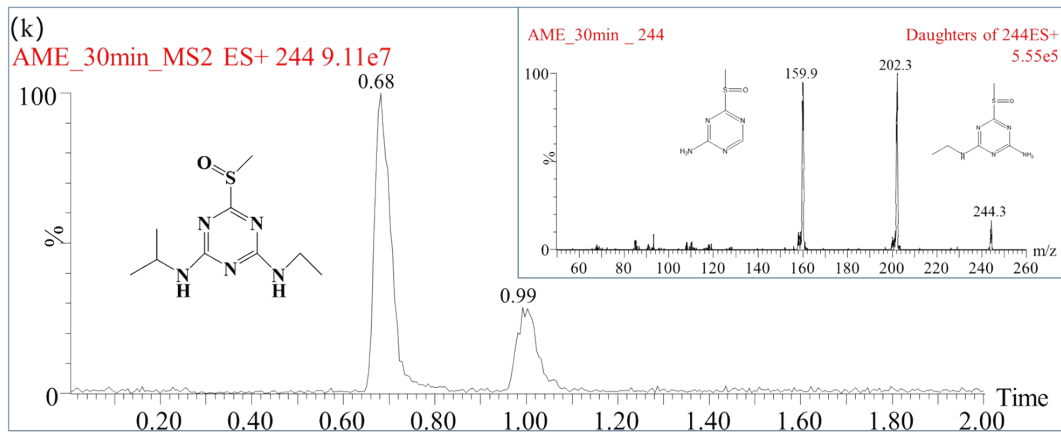

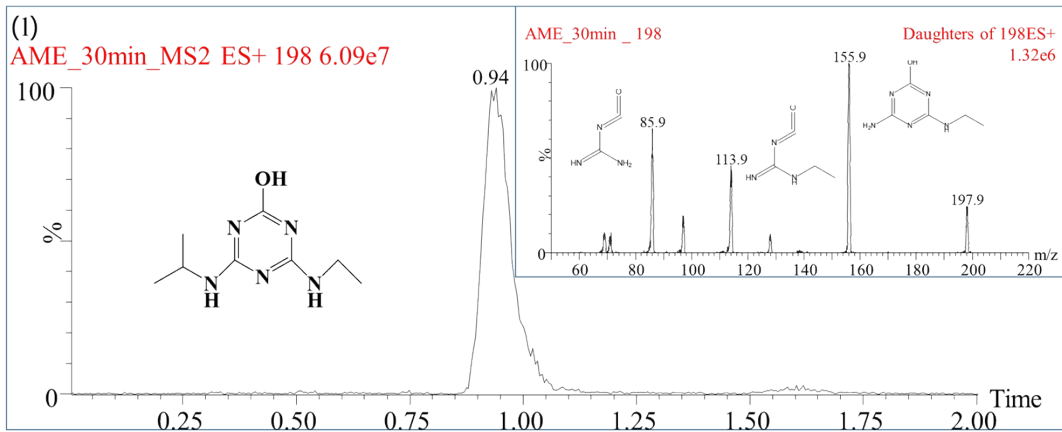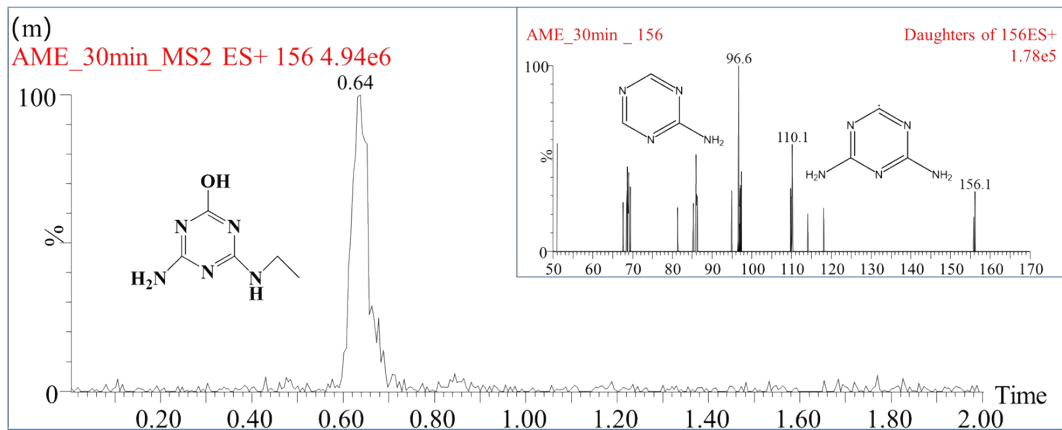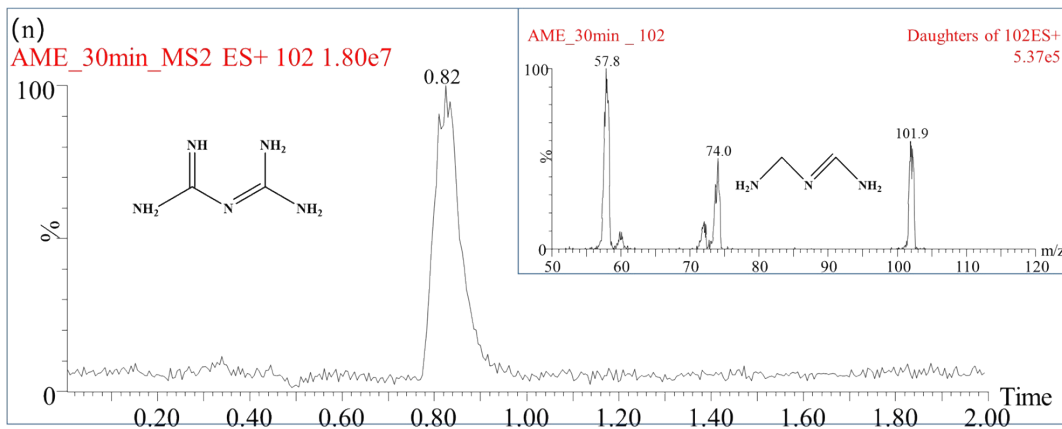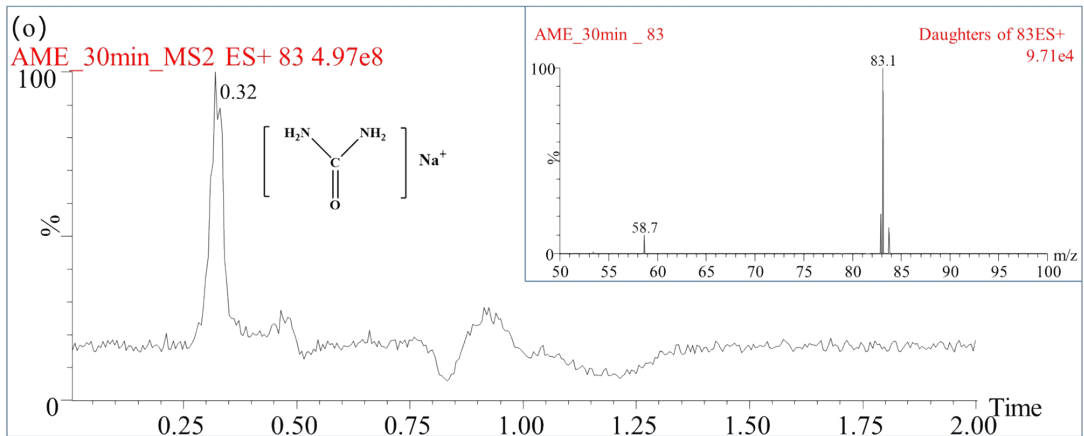



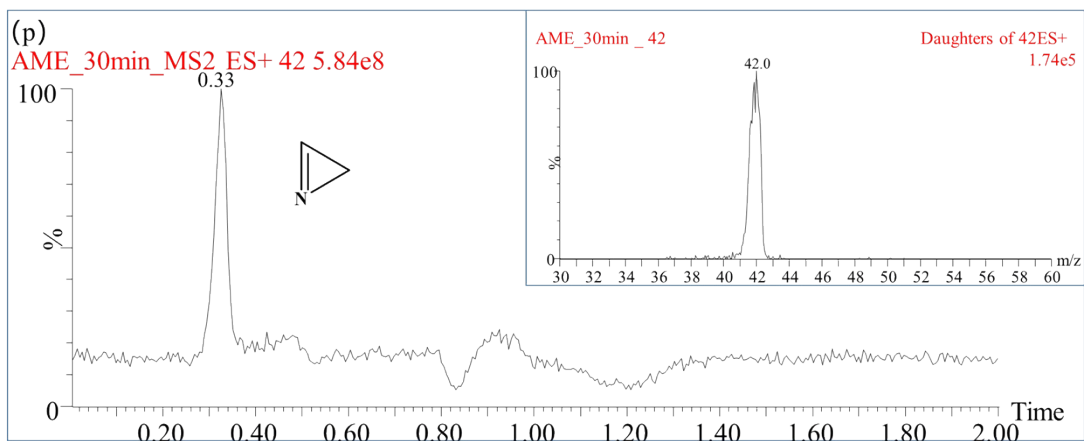

Fig. S9 (a-p) Mass chromatogram and Daughter ion Scanning Fragment of intermediates extracted from Amertyn degradation process

### 10 Fragment change trend chart

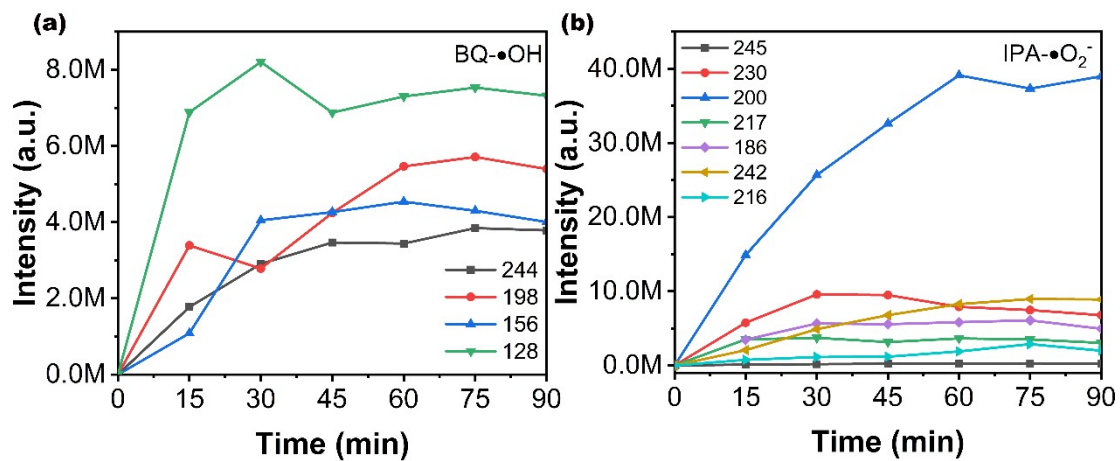

Fig. S10 Fragment change trend chart
